# Supplementary material for: Asymmetric pendrin homodimer reveals its molecular mechanism as anion exchanger
Source: PubMed Central journal article supplement (PMC10213058; doi:10.1038/s41467-023-38303-0), 2023-05-25
Supplement: 41467_2023_38303_MOESM1_ESM.pdf [file 41467_2023_38303_MOESM1_ESM.pdf]

# Supplementary Information for

## Asymmetric Pendrin Homodimer Reveals its Molecular Mechanism as Anion Exchanger

Qianying Liu<sup>1#</sup>, Xiang Zhang<sup>1#</sup>, Hui Huang<sup>1#</sup>, Yuxin Chen<sup>2,5,6,7#</sup>, Fang Wang<sup>2,5,6,7</sup>, Aihua Hao<sup>1</sup>, Wuqiang Zhan<sup>1</sup>, Qiyu Mao<sup>1</sup>, Yuxia Hu<sup>1</sup>, Lin Han<sup>1</sup>, Yifang Sun<sup>1</sup>, Meng Zhang<sup>1</sup>, Zhimin Liu<sup>1</sup>, Genglin Li<sup>2</sup>, Weijia Zhang<sup>1</sup>, Yilai Shu<sup>2,5,6,7\*</sup>, Lei Sun<sup>1,3,4\*</sup>, Zhenguo Chen<sup>1,3,4\*</sup>

Correspondence to: [zhenguo.chen@fudan.edu.cn](mailto:zhenguo.chen@fudan.edu.cn) (Z.C.); [llsun@fudan.edu.cn](mailto:llsun@fudan.edu.cn) (L.S.); and [yilai\\_shu@fudan.edu.cn](mailto:yilai_shu@fudan.edu.cn) (Y.S.)

### **This PDF file includes:**

Supplementary Fig. 1-12

Supplementary Table 1-3

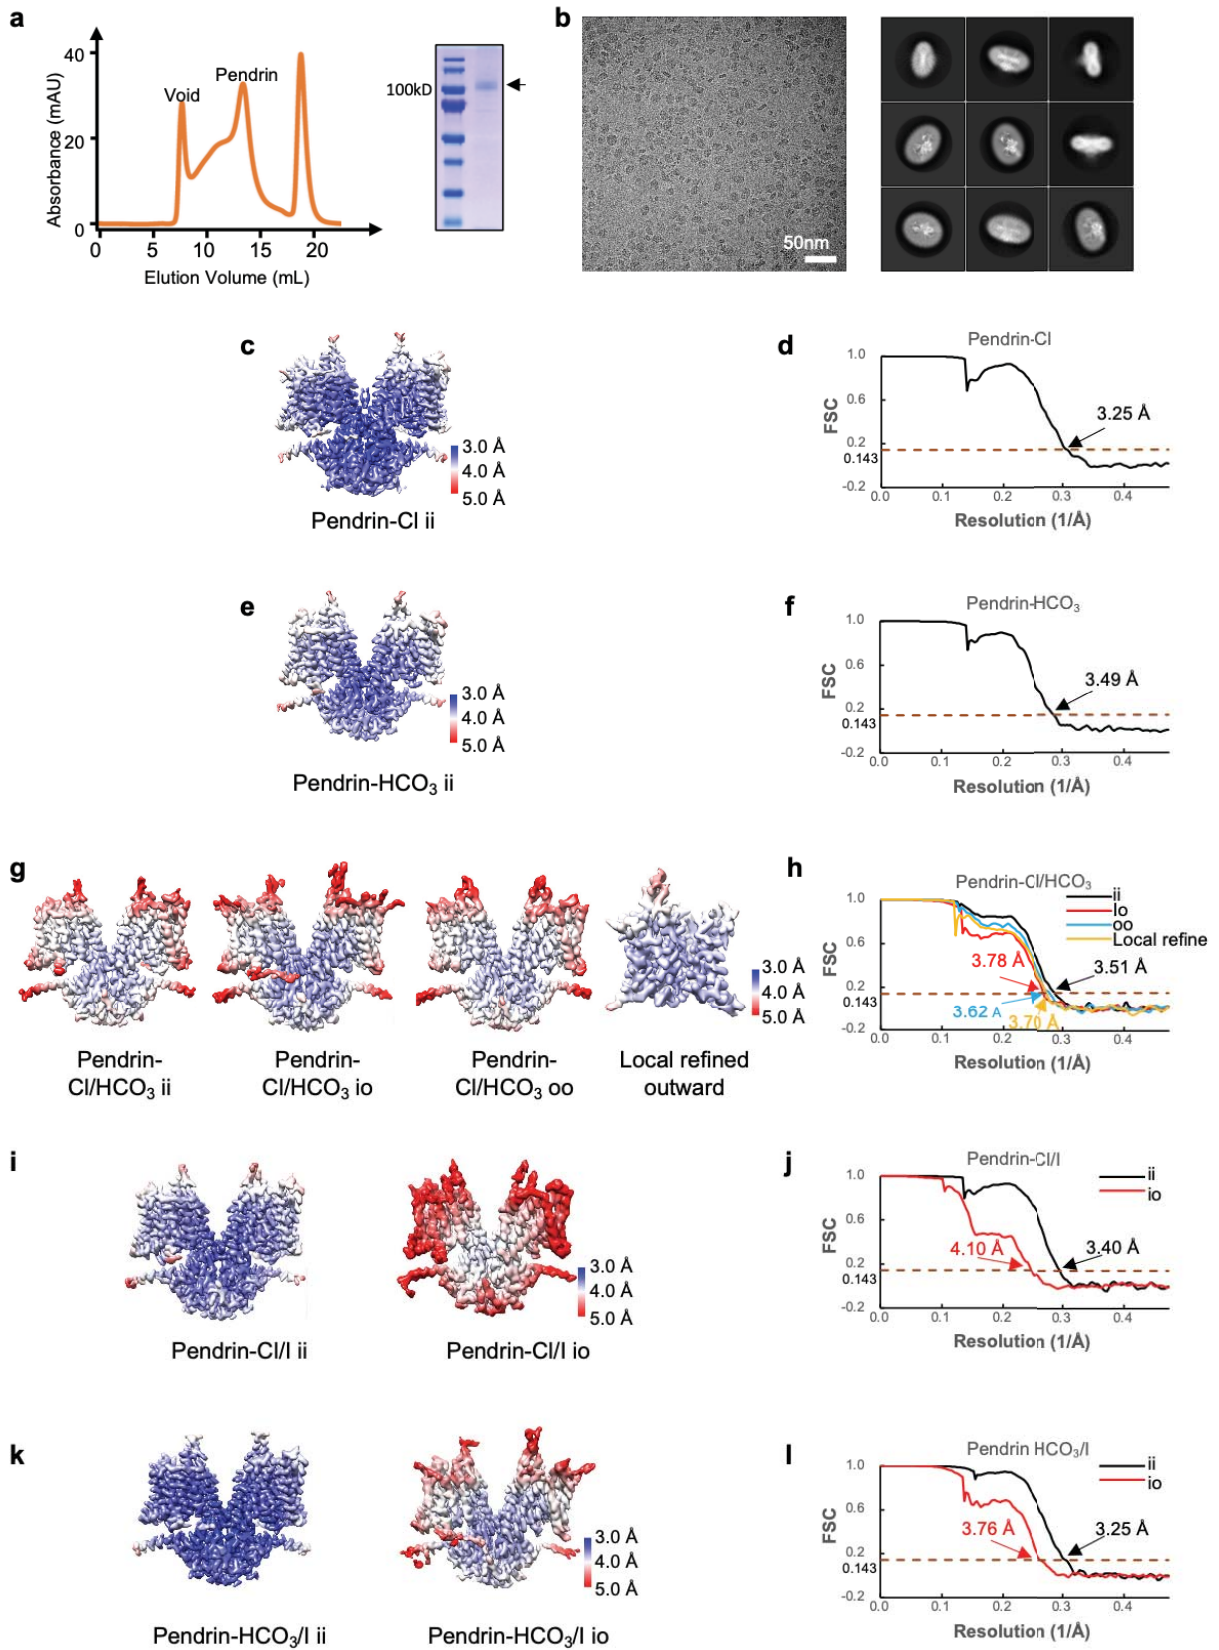

**Supplementary Fig. 1 Purification and cryo-EM data processing results of pendrin.**

**a**, Size exclusion chromatography of pendrin-Cl and SDS-PAGE gel of the peak fraction. The features and patterns were similar among all five data sets' purification. **b**, The representative of Cryo-EM micrographs and the 2D averages from pendrin-Cl dataset. **c, e, g, i, k**, Cryo-EM maps colored according to local resolution estimations. **d, f, h, j, l**, Corresponding FSC curves of the masked cryo-EM maps. ii: inward-inward, io: inward-outward, oo: outward-outward for protomer A and protomer B, respectively.

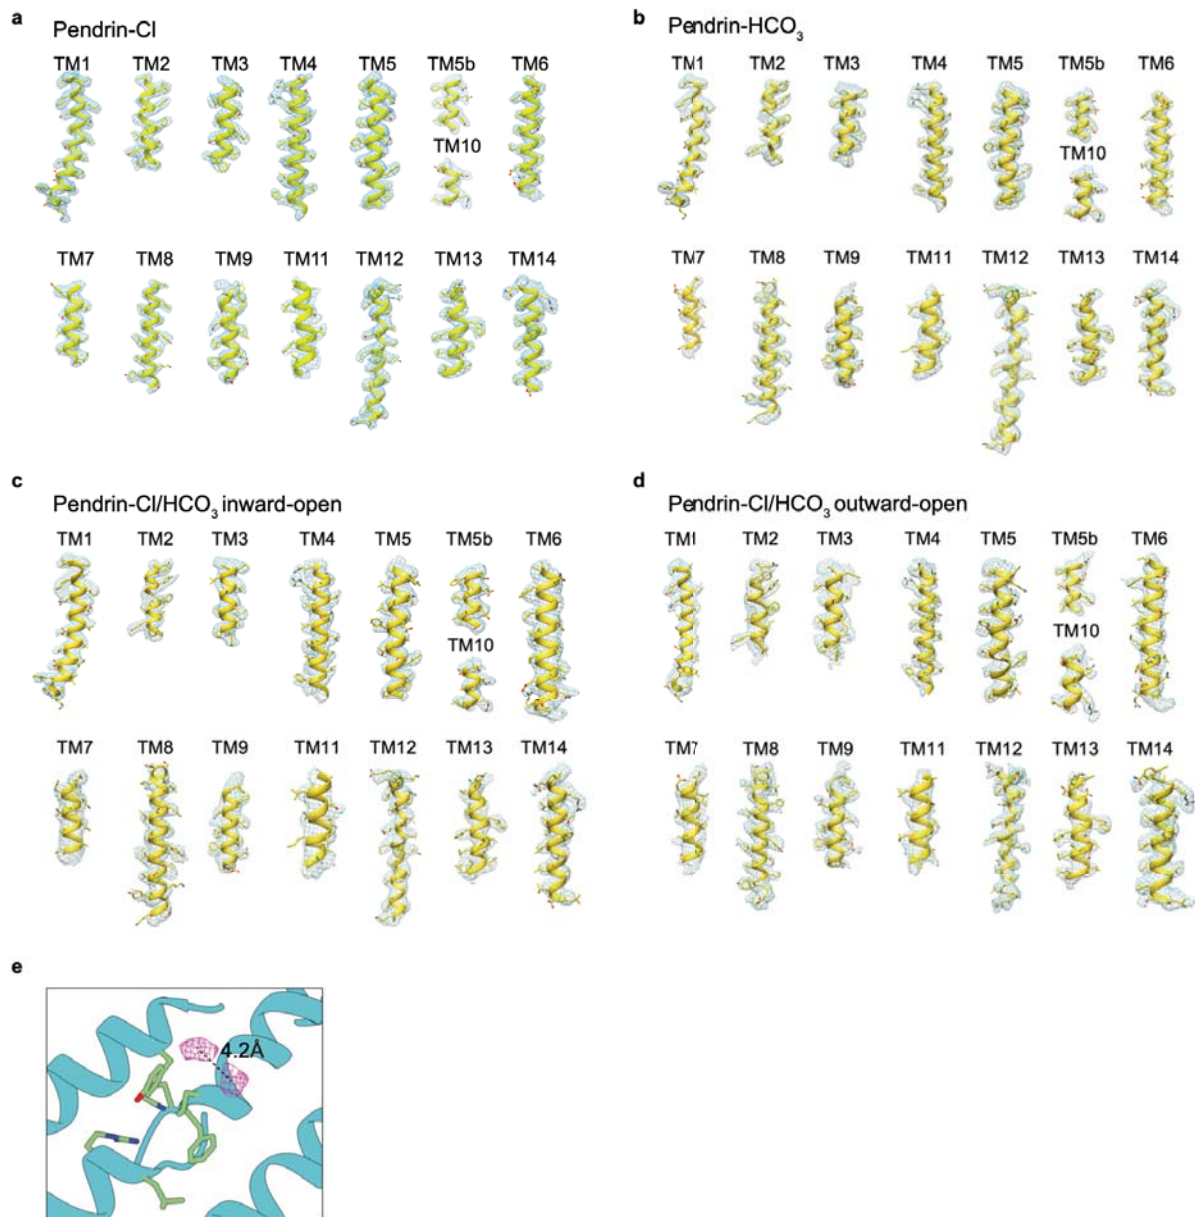

**Supplementary Fig. 2 Local cryo-EM densities.**

**a**, Representative local cryo-EM densities of pendrin-Cl <sup>ii</sup>. **b**, Representative local cryo-EM densities of pendrin-HCO<sub>3</sub> <sup>ii</sup>. **c** and **d**, Representative local cryo-EM densities of pendrin-Cl/HCO<sub>3</sub> <sup>io</sup>. **e**, Two anion densities in the outward-open cavity in pendrin-Cl/HCO<sub>3</sub>. The distance between two densities is labeled.

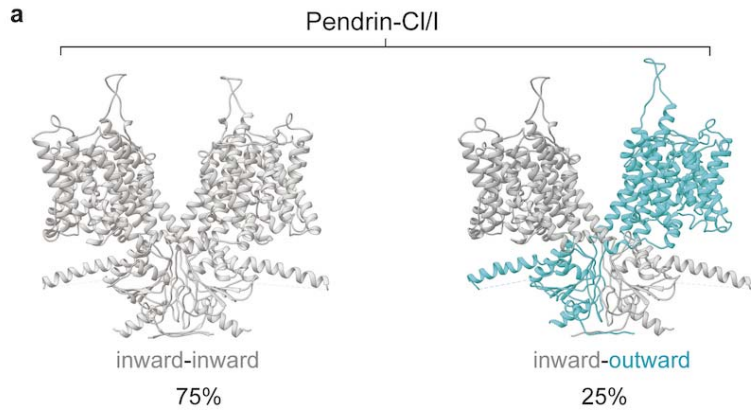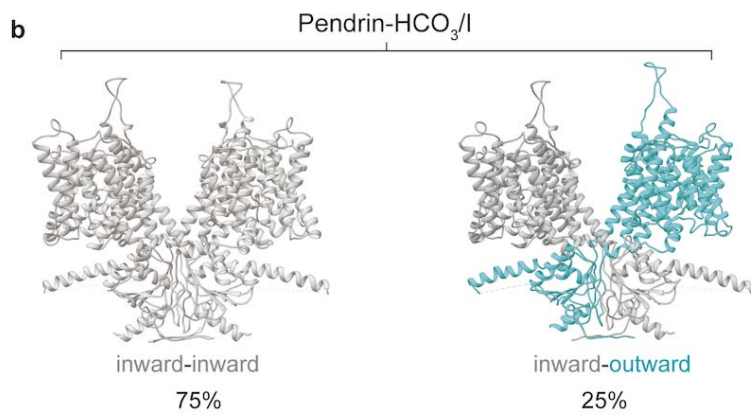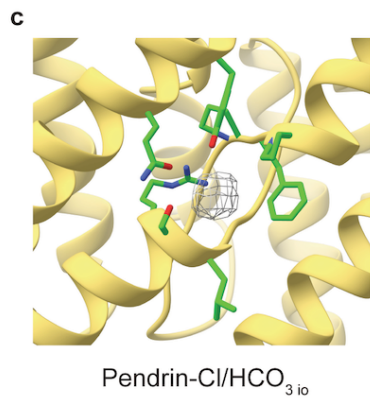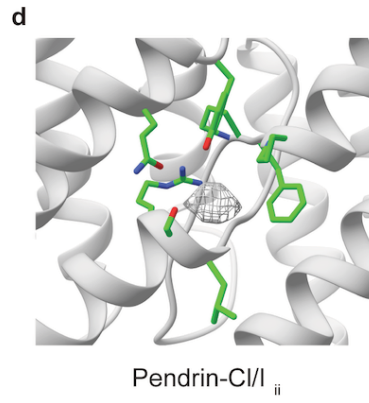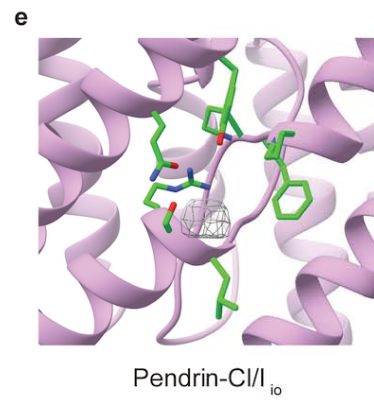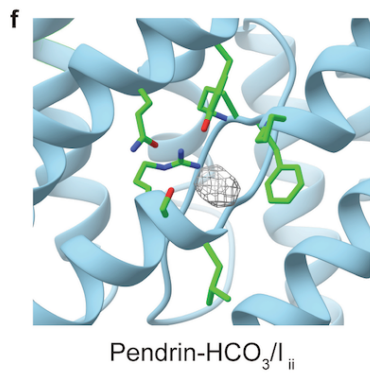

**Supplementary Fig. 3 Conformations of pendrin-Cl/I and pendrin-HCO<sub>3</sub>/I and anion densities we observed in the inward-open pocket of these structures.**

**a and b**, Two conformations of pendrin-Cl/I and pendrin-HCO<sub>3</sub>/I. The proportion of particles is indicated. **c-f**, Besides the pendrin-Cl and pendrin-HCO<sub>3</sub> in the main figure, the anion densities we absorbed in the inward-open pocket of the rest structures, c shows pendrin-Cl/HCO<sub>3</sub><sub>io</sub>, d shows pendrin-Cl/I<sub>ii</sub>, e shows pendrin-Cl/I<sub>io</sub> and f shows pendrin-HCO<sub>3</sub>/I<sub>ii</sub>. ii: inward-inward, io: inward-outward, oo: outward-outward for protomer A and protomer B, respectively. Density is shown in the light grey mesh.

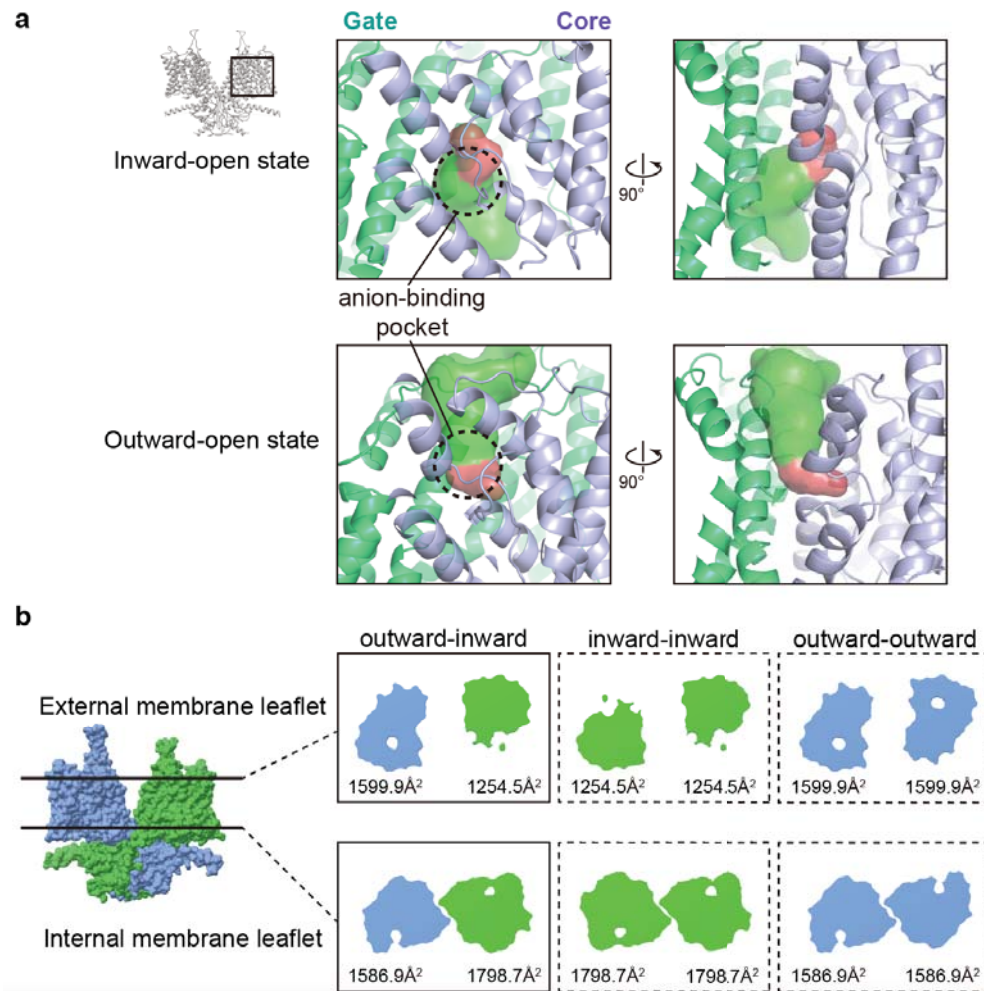

**Supplementary Fig. 4 Anion pathway cavity and cross-section area of the inward-open state and the outward-open state TMDs.**

Anion pathway analyzed by HOLE. Because pendrin functions in the manner of alternative accessing, we analyzed the inward-open TMD and outward-open TMD, respectively. **a**, The cavities from the anion-binding pocket to the intracellular or extracellular space (red cavity indicates the pathway diameter smaller than 3 Å, and green cavity indicates the pathway diameter larger than 3 Å). **b**, At the outer leaflet and the inner leaflet, cross-section areas of pendrin in three conformations are shown.

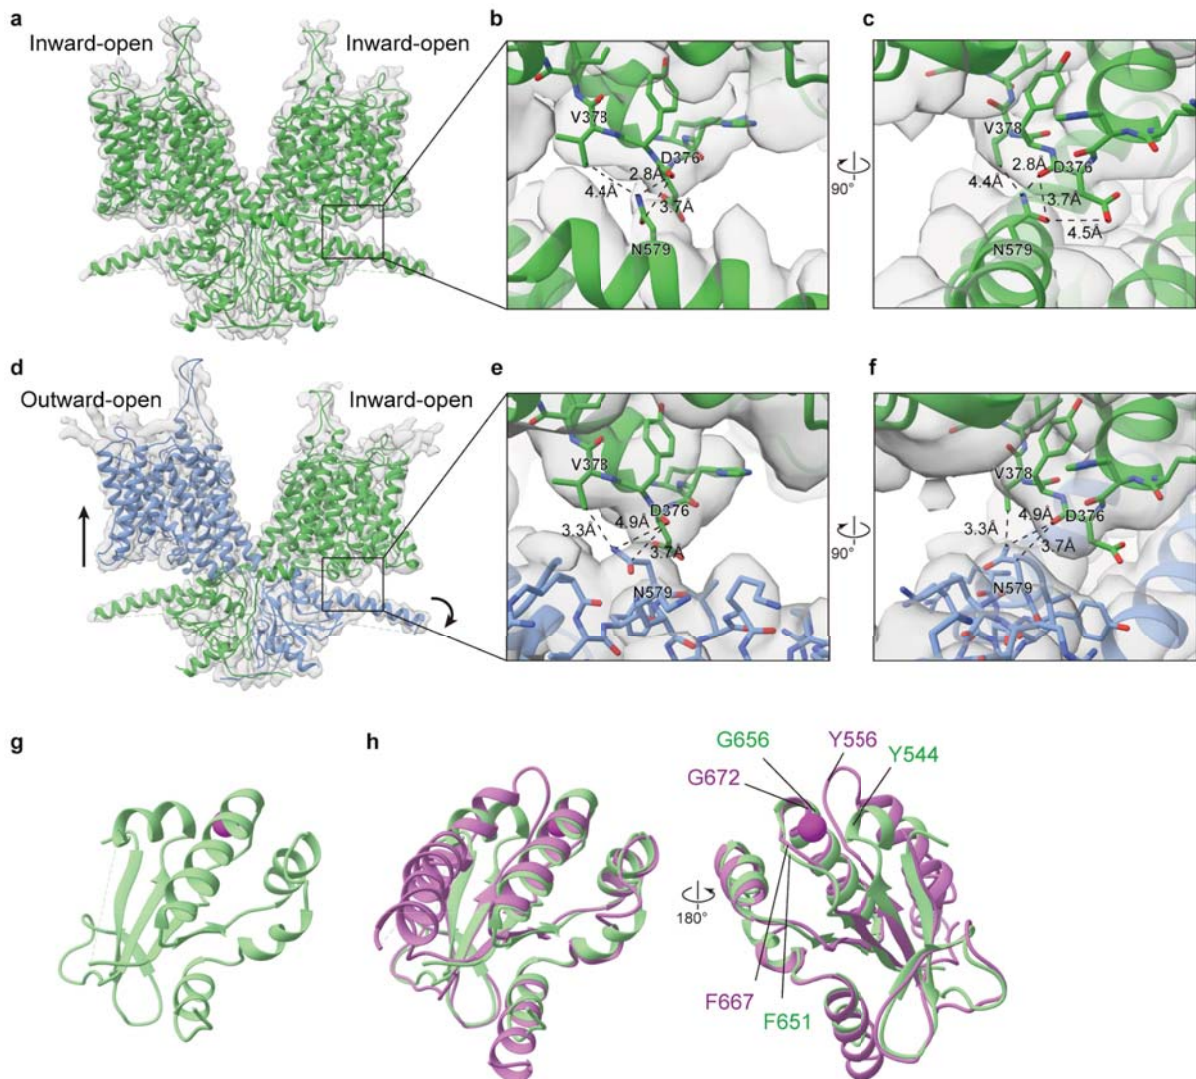

**Supplementary Fig. 5 Details of the interaction between STAS domain helix C $\alpha$ 1b and TMD and “pre-binding site”.**

**a-c**, In inward-open state C2 structures, the helix C $\alpha$ 1b is the most close to the TMD (N579 of helix C $\alpha$ 1b interacts with D376 of TM8 in core region). **d-f**, In the outward-open protomer of the asymmetric structures, the helix C $\alpha$ 1b rotates about 6° away and the core moves up to the extracellular space (marked by black arrows). Therefore, below the inward-open TMD, N579 gets a little away from D376 by C $\alpha$ 1b rotation. And below the outward-open TMD, interaction is broken by core’s movement. **g**, Crystal structure of rat prestin STAS domain in complex with chloride (PDBID: 5EUV). A Cl<sup>-</sup> in the pre-binding site is shown in magenta. **h**, Comparison of rat prestin STAS domain (light green) with pendrin STAS domain (orchid). F667, G672 and Y556 of pendrin are labeled.



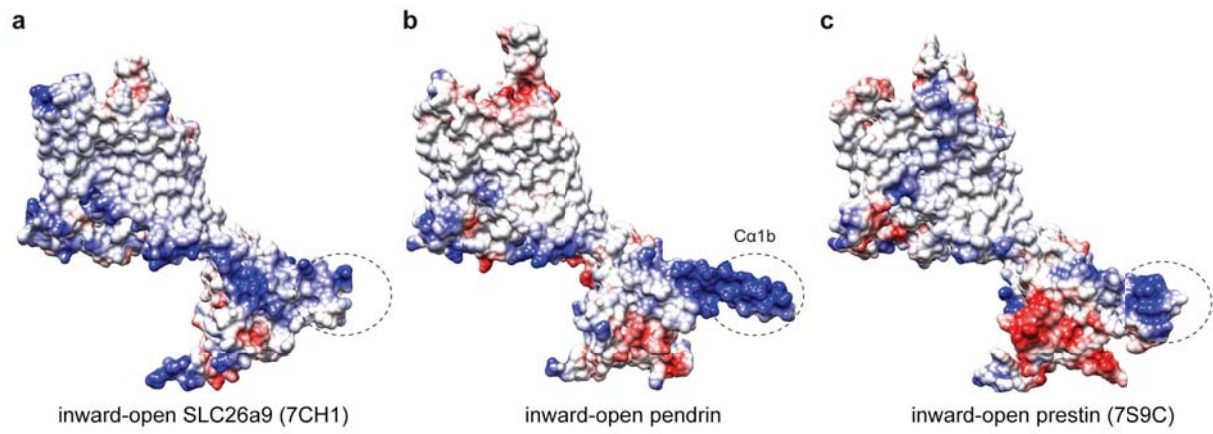

**Supplementary Fig. 6 a-c, Electrostatic potential surface of pendrin, prestin, and SLC26a9 protomers, showing the positive surface charge of Ca1b.**

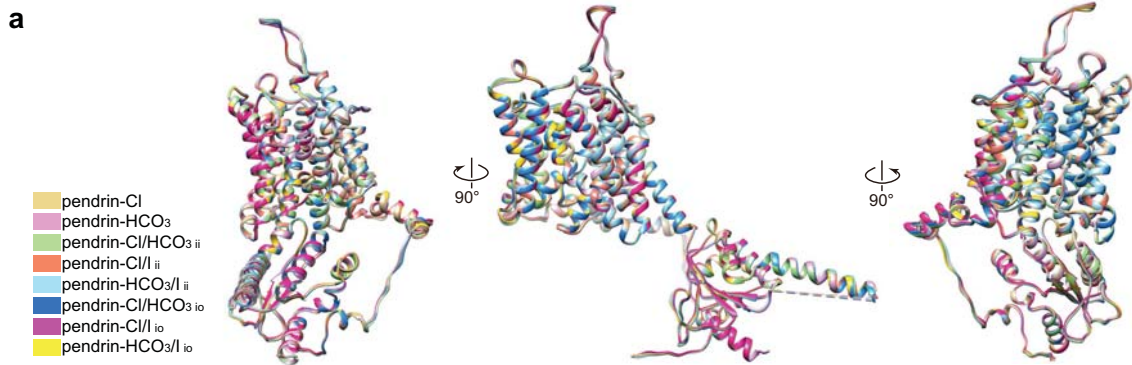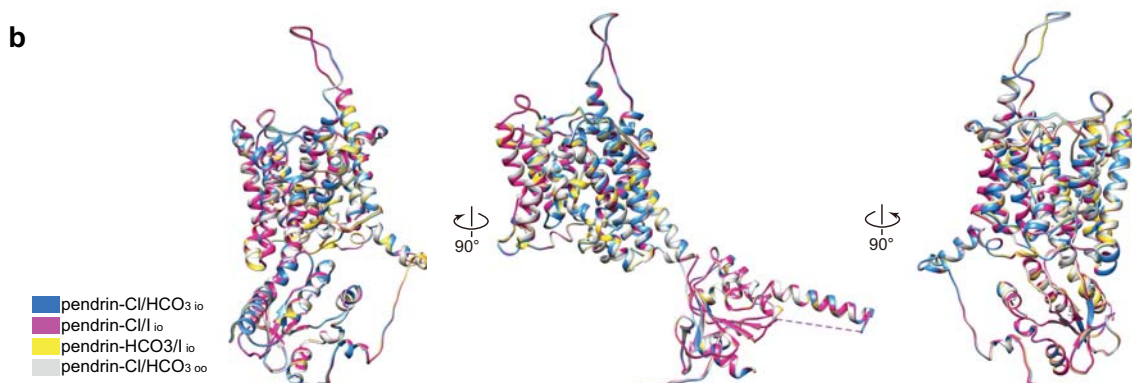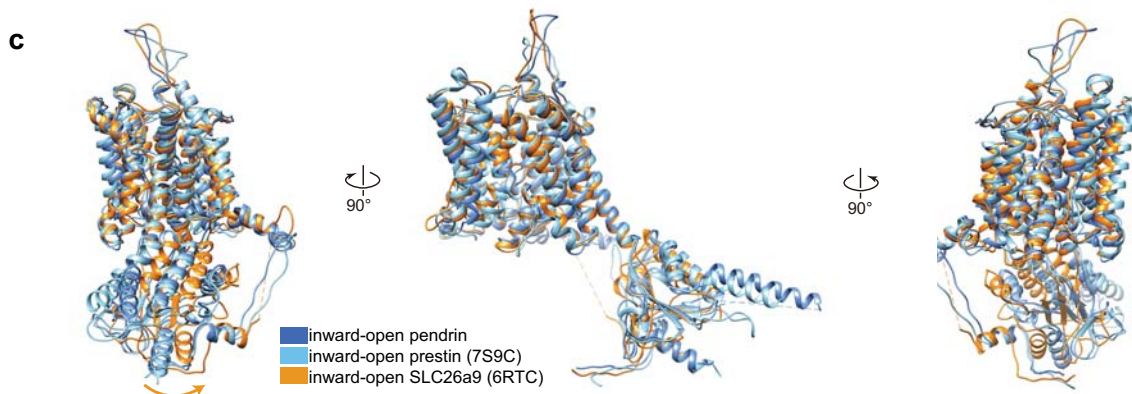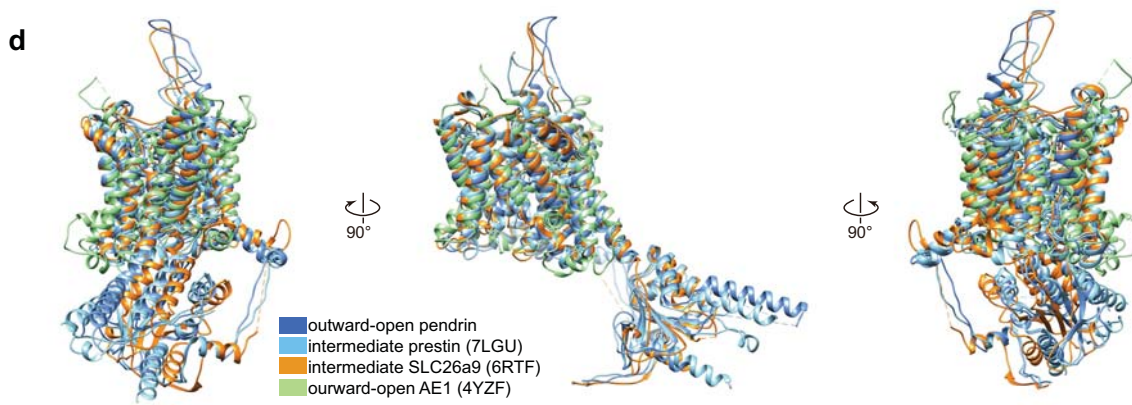

**Supplementary Fig. 7 Structural comparison of pendrin, prestin, SLC26A9, and AE1.**

**a**, Superimposing the inward-open protomers among 8 pendrin structures (pendrin-Cl, pendrin-HCO<sub>3</sub>, pendrin pendrin-Cl/HCO<sub>3</sub><sub>ii</sub>, pendrin-Cl/I<sub>ii</sub>, pendrin-HCO<sub>3</sub>/I<sub>ii</sub>, pendrin-Cl/HCO<sub>3</sub><sub>io</sub> chain A, pendrin-Cl/I<sub>io</sub> chain A, pendrin-HCO<sub>3</sub>/I<sub>io</sub> chain A). RMSDs are listed in Supplementary Table 1. **b**, Superimposing the outward-open protomers among 4 pendrin structures (pendrin-Cl/HCO<sub>3</sub><sub>io</sub> chain B, pendrin-Cl/I<sub>io</sub> chain B, pendrin-HCO<sub>3</sub>/I<sub>io</sub> chain B, pendrin-Cl/HCO<sub>3</sub><sub>oo</sub>). RMSDs are listed in Supplementary Table 1. **c**, Superimposing the inward-open protomers of pendrin-Cl, prestin (PDBID: 7S9C), SLC26A9 (PDBID: 6RTC). RMSDs are listed in Supplementary Table 2. **d**, Superimposing the outward-open protomers of pendrin-Cl/HCO<sub>3</sub><sub>oo</sub>, prestin (PDBID: 7LGU), SLC26A9 (PDBID: 6RTF), TMD of AE1 (PDBID: 4YZF). RMSDs are listed in Supplementary Table 2.

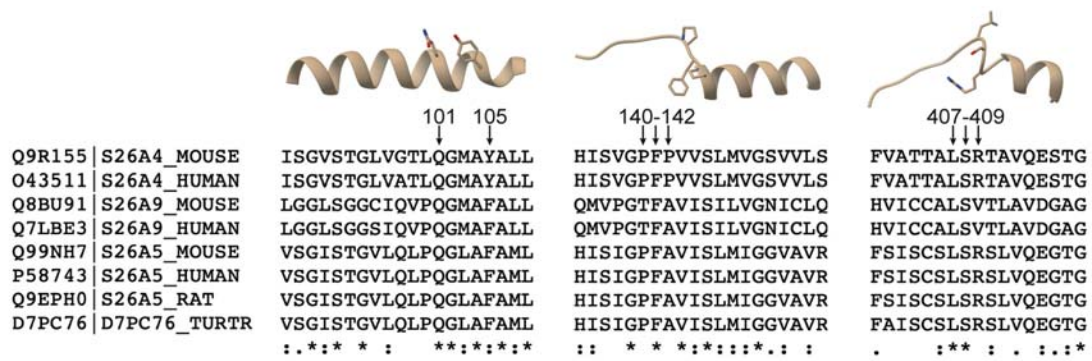

**Supplementary Fig. 8 SLC26A homologs sequence alignment around the anion binding pocket.**

These sequences were obtained from UniProt. The entry identifier is listed along with the protein name on the left.

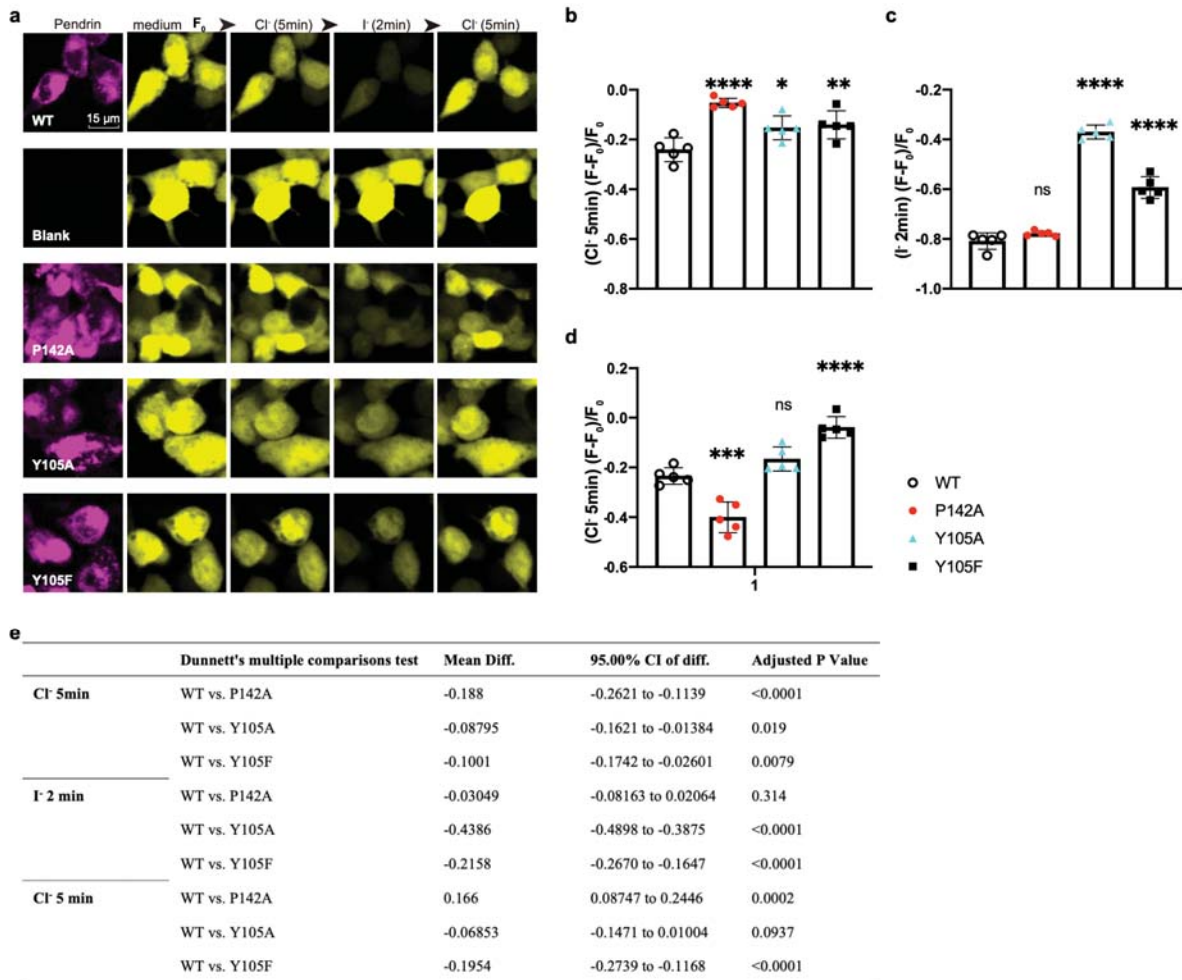

**Supplementary Fig. 9 Fluorescence change of HEK293T cells in Cl<sup>-</sup>/I<sup>-</sup> exchange assay.**

**a**, Enlargement of raw fluorescence micrographs. **b-d**, At three time points, One-way ANOVA with Dunnett's multiple comparison test was performed for comparison between multiple groups.  $n = 5$  cells examined over 3 independent experiments. Data are presented as mean values, error bars indicate SD. Multiple comparison results were the comparison versus the cells transfected with WT pendrin, \*\*\*\* $P < 0.0001$ , \*\*\* $P < 0.001$ , \*\* $P < 0.01$ , and \* $P < 0.05$ . **e**. Details of Dunnett's multiple comparisons test.

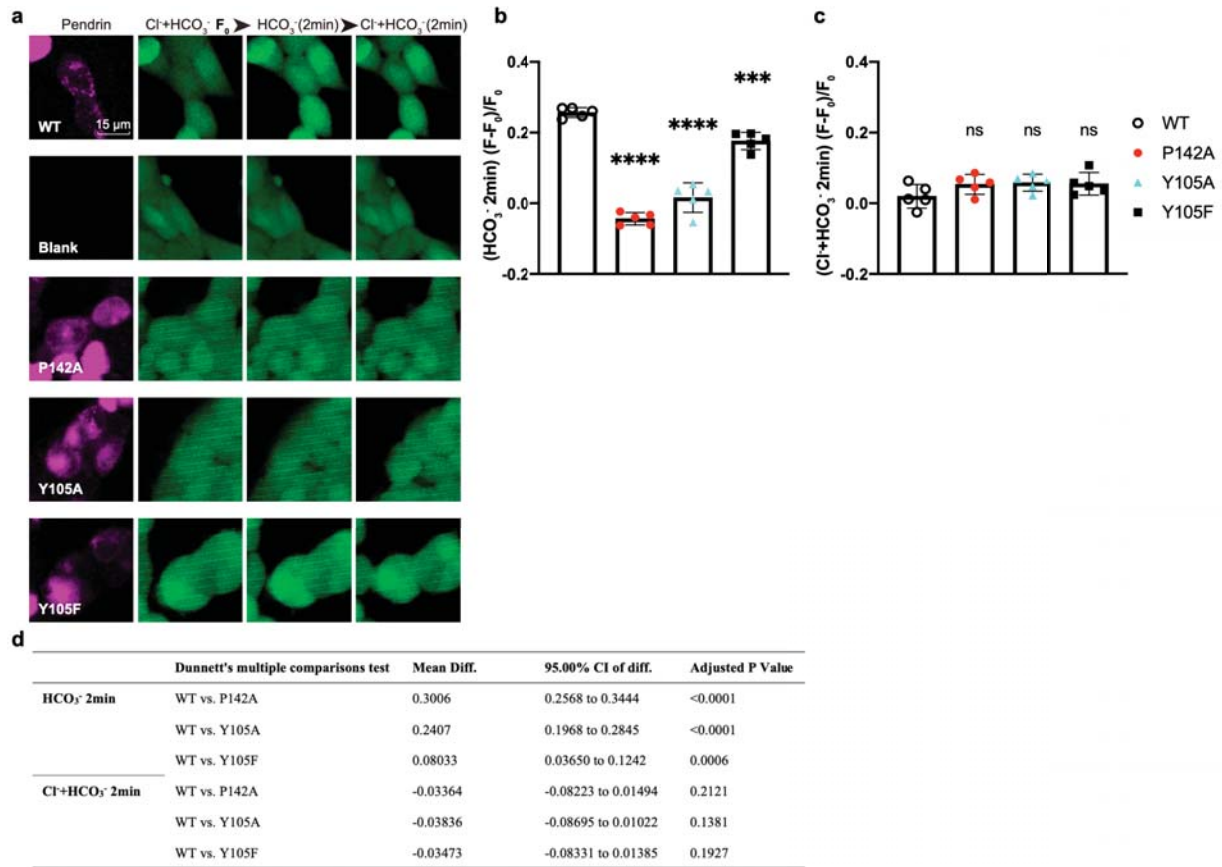

**Supplementary Fig. 10 Fluorescence change of HEK293T cells in Cl/HCO<sub>3</sub><sup>-</sup> exchange assay.**

**a**, Enlargement of raw fluorescence micrographs. **b-c**, At two time points, One-way ANOVA with Dunnnett's multiple comparison test was performed for comparison between multiple groups. n= 5 cells examined over 3 independent experiments. Data are presented as mean values, error bars indicate SD. Multiple comparison results were the comparison versus the cells transfected with WT pendrin, \*\*\*\*P < 0.0001, \*\*\*P < 0.001, \*\*P < 0.01, and \*P < 0.05. **d**. Details of Dunnnett's multiple comparisons test.

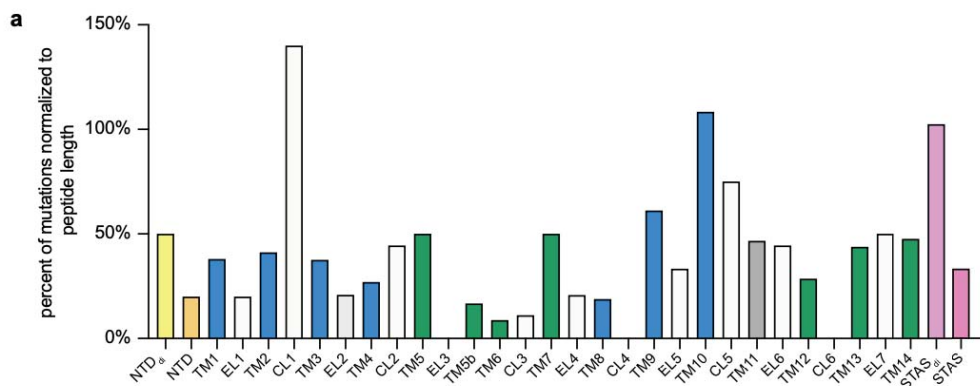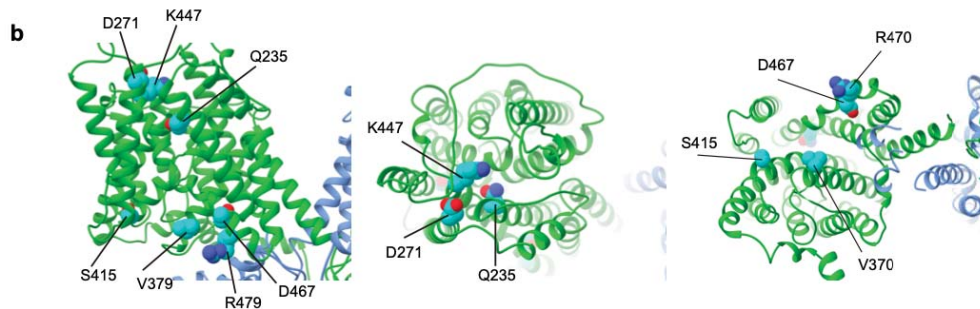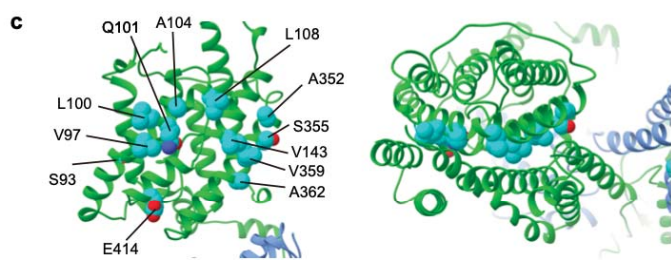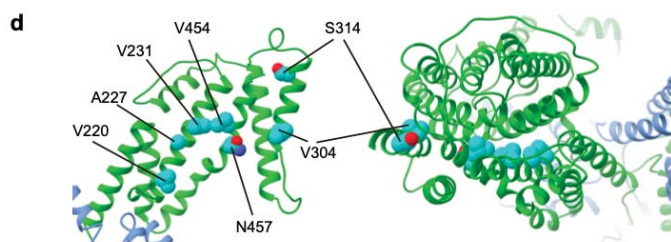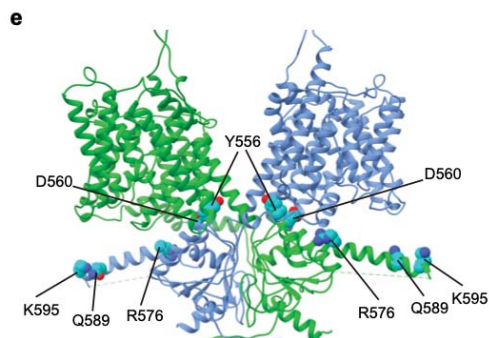

**Supplementary Fig. 11 Summary of 261 pathogenetic mutations of pendrin.**

**a**, Based on the deafness variation database (<https://deafnessvariationdatabase.org>; accessed on 20 Sep 2022), 261 of 761 missense disease-associated mutations are pathogenetic in clinic. NTD<sub>di</sub> indicates the residue in the dimerization interface of NTD, EL indicates the extracellular loop, CL indicates the cytosolic loop, and STAS<sub>di</sub> indicates the residue in the dimerization interface of STAS. **b**, Mutations along the anion exchange pathway that would change local charge. **c**, In the core region, mutation locations happened to change the interface profile. **d**, In the gate region, mutations are located on the core-gate interface regions. **e**, On the positively charged platform, the mutation locations happened to change charge.



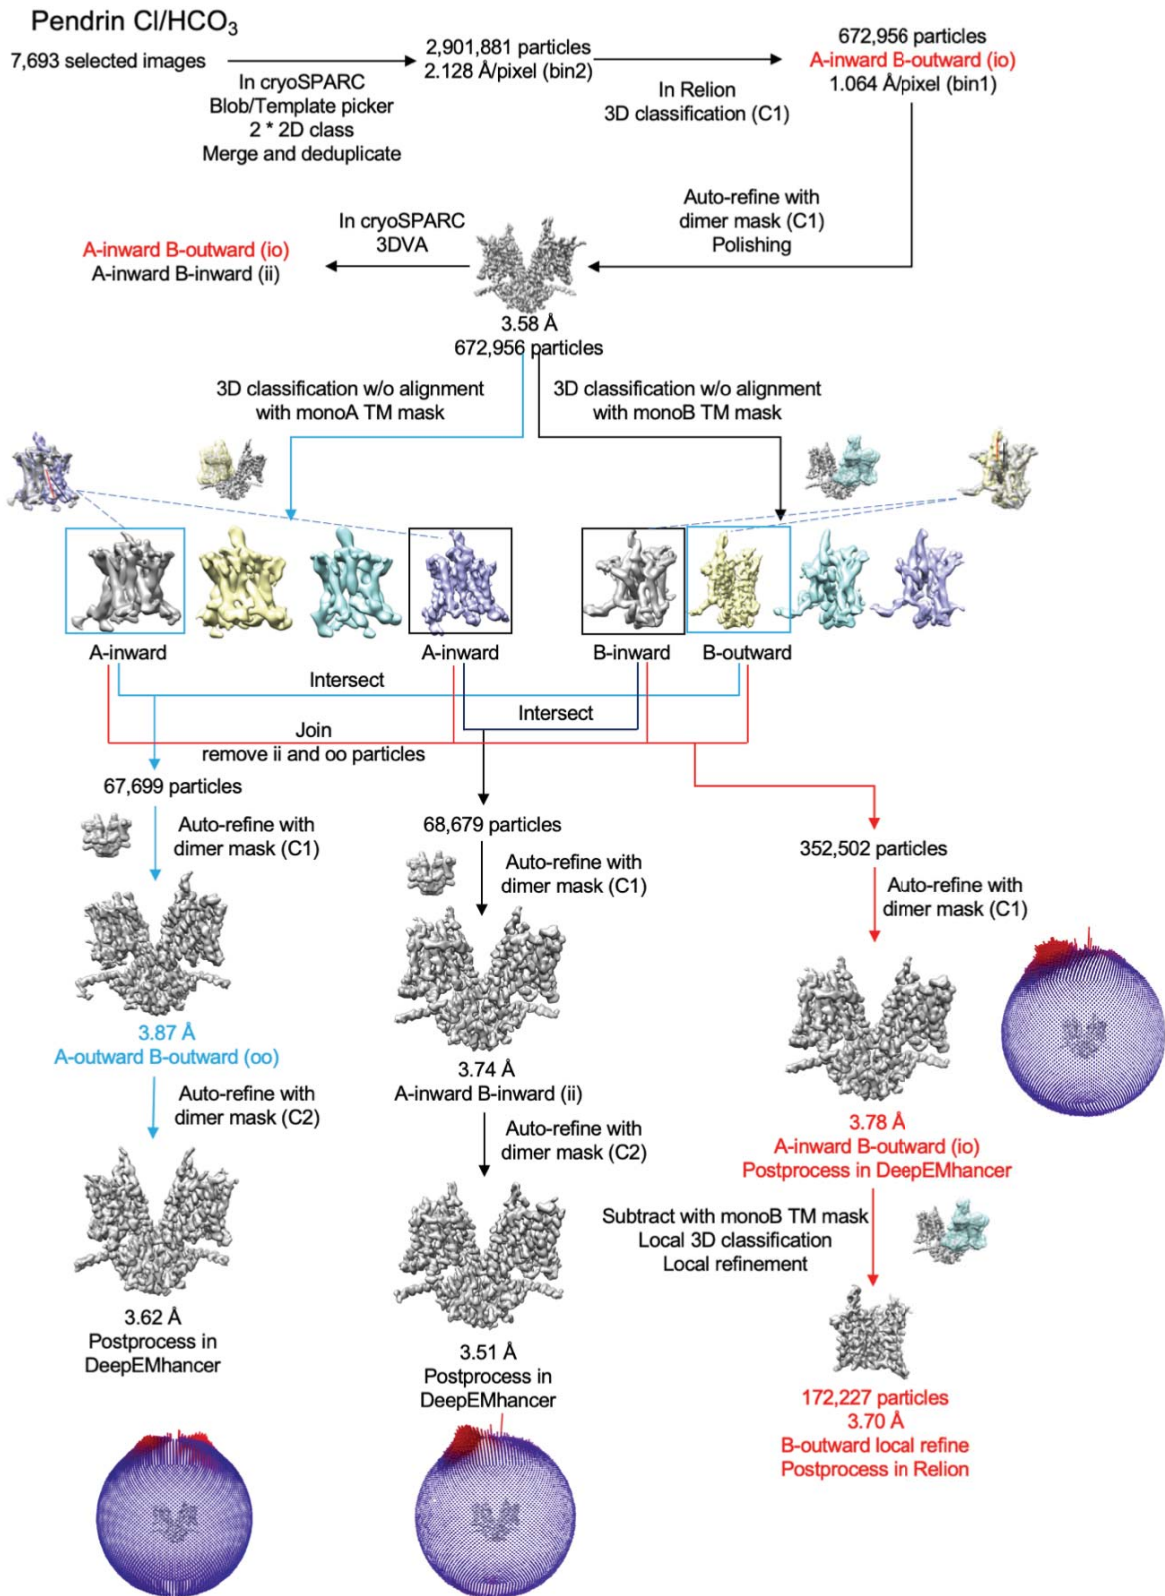

**Supplementary Fig. 12 Flowchart of pendrin-Cl/HCO<sub>3</sub> data processing.**

**Supplementary Table 1 Comparison of pendrin structures at different conditions (RMSD).**

|                                             |            |                          |                                           |                            |                                           |                                             |                                             |                              |                              |                                             |                                             |                                           |  |
|---------------------------------------------|------------|--------------------------|-------------------------------------------|----------------------------|-------------------------------------------|---------------------------------------------|---------------------------------------------|------------------------------|------------------------------|---------------------------------------------|---------------------------------------------|-------------------------------------------|--|
| pendrin-Cl                                  |            |                          |                                           |                            |                                           |                                             |                                             |                              |                              |                                             |                                             |                                           |  |
| Pendrin-HCO <sub>3</sub>                    | 0.3 (Å)    |                          |                                           |                            |                                           |                                             |                                             |                              |                              |                                             |                                             |                                           |  |
| pendrin-Cl/HCO <sub>3</sub> <sub>ii</sub>   | 0.4        | 0.4                      |                                           |                            |                                           |                                             |                                             |                              |                              |                                             |                                             |                                           |  |
| pendrin-Cl/I <sub>ii</sub>                  | 0.4        | 0.4                      | 0.4                                       |                            |                                           |                                             |                                             |                              |                              |                                             |                                             |                                           |  |
| pendrin-HCO <sub>3</sub> /I <sub>ii</sub>   | 0.4        | 0.4                      | 0.4                                       | 0.3                        |                                           |                                             |                                             |                              |                              |                                             |                                             |                                           |  |
| pendrin-Cl/HCO <sub>3</sub> <sub>io</sub> A | 0.5        | 0.5                      | 0.4                                       | 0.5                        | 0.5                                       |                                             |                                             |                              |                              |                                             |                                             |                                           |  |
| pendrin-Cl/HCO <sub>3</sub> <sub>io</sub> B | 4.4        | 4.5                      | 4.4                                       | 4.4                        | 4.4                                       | 4.4                                         |                                             |                              |                              |                                             |                                             |                                           |  |
| pendrin-Cl/I <sub>io</sub> A                | 0.5        | 0.5                      | 0.4                                       | 0.4                        | 0.5                                       | 0.2                                         | 4.3                                         |                              |                              |                                             |                                             |                                           |  |
| pendrin-Cl/I <sub>io</sub> B                | 4.4        | 4.5                      | 4.3                                       | 4.3                        | 4.3                                       | 4.3                                         | 0.2                                         | 4.3                          |                              |                                             |                                             |                                           |  |
| pendrin-HCO <sub>3</sub> /I <sub>io</sub> A | 0.5        | 0.5                      | 0.5                                       | 0.5                        | 0.5                                       | 0.2                                         | 4.4                                         | 0.3                          | 4.4                          |                                             |                                             |                                           |  |
| pendrin-HCO <sub>3</sub> /I <sub>io</sub> B | 4.3        | 4.4                      | 4.3                                       | 4.3                        | 4.3                                       | 4.3                                         | 0.2                                         | 4.3                          | 0.2                          | 4.4                                         |                                             |                                           |  |
| pendrin-Cl/HCO <sub>3</sub> <sub>oo</sub>   | 4.5        | 4.6                      | 4.4                                       | 4.4                        | 4.5                                       | 4.4                                         | 0.3                                         | 4.4                          | 0.4                          | 4.5                                         | 0.4                                         |                                           |  |
|                                             | pendrin-Cl | pendrin-HCO <sub>3</sub> | pendrin-Cl/HCO <sub>3</sub> <sub>ii</sub> | pendrin-Cl/I <sub>ii</sub> | pendrin-HCO <sub>3</sub> /I <sub>ii</sub> | pendrin-Cl/HCO <sub>3</sub> <sub>io</sub> A | pendrin-Cl/HCO <sub>3</sub> <sub>io</sub> B | pendrin-Cl/I <sub>io</sub> A | pendrin-Cl/I <sub>io</sub> B | pendrin-HCO <sub>3</sub> /I <sub>io</sub> A | pendrin-HCO <sub>3</sub> /I <sub>io</sub> B | pendrin-Cl/HCO <sub>3</sub> <sub>oo</sub> |  |

**Supplementary Table 2 Comparison of pendrin structures with representative structures of prestin and SLC26A9 (RMSD).**

|                                          |            |               |               |                |                |                |                |                |               |                                          |  |
|------------------------------------------|------------|---------------|---------------|----------------|----------------|----------------|----------------|----------------|---------------|------------------------------------------|--|
| Pendrin-Cl                               |            |               |               |                |                |                |                |                |               |                                          |  |
| SLC26A9 (6RTC)                           | 4.6 (Å)    |               |               |                |                |                |                |                |               |                                          |  |
| SLC26A9 (7CH1)                           | 4.1        | 3.4           |               |                |                |                |                |                |               |                                          |  |
| Prestin (7S9C)                           | 3          | 5.3           | 5.3           |                |                |                |                |                |               |                                          |  |
| Prestin (7LH2)                           | 3.8        | 6.3           | 6.3           | 2.3            |                |                |                |                |               |                                          |  |
| Prestin (7S9D)                           | 3.1        | 6.1           | 6             | 2.1            | 1.9            |                |                |                |               |                                          |  |
| Prestin (7S8X)                           | 3.6        | 6.9           | 7.2           | 2.7            | 1.6            | 1.9            |                |                |               |                                          |  |
| Prestin (7LGU)                           | 4.5        | 7.5           | 8             | 3.1            | 1.2            | 2.4            | 1.4            |                |               |                                          |  |
| SLC26A9 (6RTF)                           | 4.3        | 3             | 4.8           | 4.3            | 4.4            | 4.8            | 5.1            | 5.8            |               |                                          |  |
| Pendrin-Cl/HCO <sub>3</sub> <sup>∞</sup> | 4.5        | 7             | 6.8           | 4.4            | 4.2            | 3.8            | 3.3            | 3.9            | 5.1           |                                          |  |
|                                          | Pendrin-Cl | SLC26A9(6RTC) | SLC26A9(7CH1) | Prestin (7S9C) | Prestin (7LH2) | Prestin (7S9D) | Prestin (7S8X) | Prestin (7LGU) | SLC26A9(6RTF) | Pendrin-Cl/HCO <sub>3</sub> <sup>∞</sup> |  |

**Supplementary Table 3 Cryo-EM data collection and refinement statistics.**

|                                                   | pendrin-<br>Cl | pendrin-<br>HCO <sub>3</sub> | pendrin-<br>Cl/I <sub>ii</sub> | pendrin-<br>Cl/I <sub>io</sub> | pendrin-<br>Cl/HCO <sub>3</sub> <sub>ii</sub> | pendrin-<br>Cl/HCO <sub>3</sub> <sub>io</sub> | Local<br>refinement<br>of pendrin-<br>Cl/HCO <sub>3</sub> <sub>io</sub> | pendrin-<br>Cl/HCO <sub>3</sub> <sub>oo</sub> | pendrin-<br>HCO <sub>3</sub> /I <sub>ii</sub> | pendrin-<br>HCO <sub>3</sub> /I <sub>io</sub> |
|---------------------------------------------------|----------------|------------------------------|--------------------------------|--------------------------------|-----------------------------------------------|-----------------------------------------------|-------------------------------------------------------------------------|-----------------------------------------------|-----------------------------------------------|-----------------------------------------------|
| <b>PDB ID</b>                                     | 7WK1           | 7WK7                         | 7WL8                           | 7WLB                           | 7WL7                                          | 7WL9                                          |                                                                         | 7WLE                                          | 7WL2                                          | 7WLA                                          |
| <b>EMDB</b>                                       | 32555          | 32561                        | 32577                          | 32580                          | 32576                                         | 32578                                         | 33232                                                                   | 32583                                         | 32574                                         | 32579                                         |
| <b>Data collection and processing</b>             |                |                              |                                |                                |                                               |                                               |                                                                         |                                               |                                               |                                               |
| Data sets                                         | pendrin-<br>Cl | pendrin-<br>HCO <sub>3</sub> | pendrin-Cl/I                   |                                |                                               | pendrin-Cl/HCO <sub>3</sub>                   |                                                                         | pendrin- HCO <sub>3</sub> /I                  |                                               |                                               |
| Voltage (kV)                                      | 300            | 300                          | 300                            |                                |                                               | 300                                           |                                                                         | 300                                           |                                               |                                               |
| Detector                                          | K2             | K2                           | K3                             |                                |                                               | K3                                            |                                                                         | K2                                            |                                               |                                               |
| Pixel size (Å)                                    | 1.046          | 1.046                        | 1.064                          |                                |                                               | 1.064                                         |                                                                         | 1.046                                         |                                               |                                               |
| Electron dose (e <sup>-</sup> /Å <sup>2</sup> )   | 53             | 53                           | 58                             |                                |                                               | 58                                            |                                                                         | 53                                            |                                               |                                               |
| Defocus range (µm)                                | -1.2 to -2.2   | -1.2 to -2.2                 | -1.2 to -2.2                   |                                |                                               | -1.2 to -2.2                                  |                                                                         | -1.2 to -2.2                                  |                                               |                                               |
| Final particles                                   | 120,887        | 134,404                      | 79,043                         | 45,859                         | 68,679                                        | 353,288                                       | 172,227                                                                 | 67,699                                        | 221,446                                       | 365,679                                       |
| Final resolution (Å)                              | 3.25           | 3.49                         | 3.40                           | 4.10                           | 3.51                                          | 3.78                                          | 3.70                                                                    | 3.62                                          | 3.25                                          | 3.76                                          |
| <b>Model refinement and validation statistics</b> |                |                              |                                |                                |                                               |                                               |                                                                         |                                               |                                               |                                               |
| Ramachandran statistics                           |                |                              |                                |                                |                                               |                                               |                                                                         |                                               |                                               |                                               |
| Favored (%)                                       | 94.70          | 94.93                        | 95.31                          | 95.45                          | 95.31                                         | 95.30                                         |                                                                         | 93.92                                         | 95.01                                         | 94.92                                         |
| Allowed (%)                                       | 5.22           | 4.99                         | 4.61                           | 4.55                           | 4.61                                          | 4.62                                          |                                                                         | 6.08                                          | 4.92                                          | 5.08                                          |
| Outliers (%)                                      | 0.08           | 0.08                         | 0.08                           | 0.00                           | 0.08                                          | 0.08                                          |                                                                         | 0.00                                          | 0.08                                          | 0.00                                          |
| Rotamer outliers (%)                              | 3.12           | 2.94                         | 1.87                           | 3.92                           | 3.39                                          | 4.27                                          |                                                                         | 5.25                                          | 2.14                                          | 4.01                                          |
| R.m.s. deviations                                 |                |                              |                                |                                |                                               |                                               |                                                                         |                                               |                                               |                                               |
| Bond lengths (Å)                                  | 0.002          | 0.001                        | 0.002                          | 0.002                          | 0.001                                         | 0.002                                         |                                                                         | 0.002                                         | 0.002                                         | 0.002                                         |
| Bond angles (°)                                   | 0.406          | 0.406                        | 0.402                          | 0.400                          | 0.409                                         | 0.403                                         |                                                                         | 0.426                                         | 0.412                                         | 0.405                                         |
