# Supplementary material for: Asymmetric pendrin homodimer reveals its molecular mechanism as anion exchanger
Source: PubMed Central journal article supplement (PMC10213058; doi:10.1038/s41467-023-38303-0), 2023-05-25
Supplement: 41467_2023_38303_MOESM2_ESM.pdf [file 41467_2023_38303_MOESM2_ESM.pdf]

### **Description of Additional Supplementary Files**

File Name: Supplementary Data 1

Description: Pathogenetic missense variants of pendrin from Deafness Variation Database.

File Name: Supplementary Movie 1

Description: Conformational change of pendrin homodimer. The movement of the inward-open state to the outward-open state is simulated.
